# Supplementary material for: Trans vs. cis: a computational study of enasidenib resistance due to IDH2 mutations
Source: Royal Society of Chemistry journal article supplement (doi:10.1039/d4cp01571a), 2024-01-01
Supplement: d4cp01571a1.pdf [file d4cp01571a1.pdf]

# Supporting information: Trans vs Cis: A Computational Study of Enasidenib Resistance due to IDH2 Mutations

Erik Lindahl<sup>1</sup>, Erik Arvidsson<sup>2</sup> and Ran Friedman<sup>1</sup>

## Abstract

This file includes supplementary methods and a section on data availability.

## Keywords

PCMEDA, drug resistance, targeted therapy, resistance mutations

<sup>1</sup>Department of Chemistry, Linnaeus University, SE-391 82 Kalmar, Sweden; E-mail: ran.friedman@lnu.se

<sup>2</sup>Program in Medicine, Linköping University, Sandbäcksgatan 7, 582 25 Linköping, Sweden

\*Corresponding author: ran.friedman@lnu.se

## Contents

|   |                       |   |
|---|-----------------------|---|
| 1 | Supplementary Figures | 1 |
| 2 | Supplementary Tables  | 3 |
| 3 | Data availability     | 3 |

## 1. Supplementary Figures

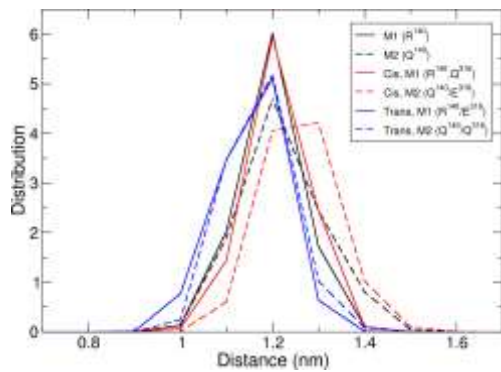

(a) Apo IDH2

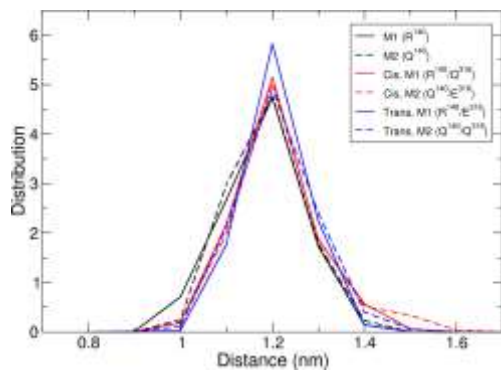

(b) Drug-bound IDH2

**Figure 1.** Distance distribution for the opening of the back cleft in IDH2, as calculated from the distance between the C $\alpha$  atoms of residues Tyr<sup>238</sup> and His<sup>381</sup>. M1 is monomer 1 and M2 is monomer 2.

## 2. Supplementary Tables

**Table 1.** Median and maximal  $C\alpha$  RMSD values calculated from four 100 ns simulations. All values in nm.

| Protein           | Median RMSD | Max RMSD |
|-------------------|-------------|----------|
| R140Q apo         | 0.24        | 0.36     |
| <i>Cis</i> apo    | 0.27        | 0.42     |
| <i>Trans</i> apo  | 0.23        | 0.34     |
| R140Q holo        | 0.25        | 0.46     |
| <i>Cis</i> holo   | 0.24        | 0.39     |
| <i>Trans</i> holo | 0.24        | 0.35     |

## 3. Data availability

Input files for energy calculations, EDA and NCI are freely available at:

<https://dx.doi.org/10.6084/m9.figshare.25205792>
